# Supplementary material for: In Vitro Evaluation of the Effects of Prebiotics GOS and FOS on Human Colonic Caco–2 Cells
Source: Preprints.org preprint supplement (doi:10.20944/preprints202004.0108.v1), 2020-04-07
Supplement: Supplementary file 1 [file supplementary]

## Sheet: GOS-FOS_FDR<0-05 FC>1-5
Name	Chromosome	Region	Identifier	GOS vs. mockGOS - Max group means	GOS vs. mockGOS - Fold change	GOS vs. mockGOS - Log fold change	GOS vs. mockGOS - P-value	GOS vs. mockGOS - FDR p-value	GOS vs. mockGOS - Bonferroni	FOS vs. mockFOS - Max group means	FOS vs. mockFOS - Fold change	FOS vs. mockFOS - Log fold change	FOS vs. mockFOS - P-value	FOS vs. mockFOS - FDR p-value	FOS vs. mockFOS - Bonferroni	GOS-1 - Total counts	GOS-1 - RPKM	GOS-1 - TPM	GOS-1 - CPM	GOS-2 - Total counts	GOS-2 - RPKM	GOS-2 - TPM	GOS-2 - CPM	GOS-3 - Total counts	GOS-3 - RPKM	GOS-3 - TPM	GOS-3 - CPM	GOSmock-1 - Total counts	GOSmock-1 - RPKM	GOSmock-1 - TPM	GOSmock-1 - CPM	GOSmock-2 - Total counts	GOSmock-2 - RPKM	GOSmock-2 - TPM	GOSmock-2 - CPM	GOSmock-3 - Total counts	GOSmock-3 - RPKM	GOSmock-3 - TPM	GOSmock-3 - CPM	FOS-1 - Total counts	FOS-1 - RPKM	FOS-1 - TPM	FOS-1 - CPM	FOS-2 - Total counts	FOS-2 - RPKM	FOS-2 - TPM	FOS-2 - CPM	FOS-3 - Total counts	FOS-3 - RPKM
AL139011.2	1	complement(160217464..160285130)	ENSG00000258465	0.511673	9.93023	3.31183	4.33133e-09	2.31345e-06	9.30153e-05	0.406699	31.6857	4.98576	1.5491e-06	0.00415836	0.0332669	67	0.389408	1.18688	1.17743	47	0.626493	1.86972	1.98538	38	0.519119	1.51519	1.66163	2	0.0247549	0.0729045	0.0760464	1	0.0166857	0.0485062	0.0530615	7	0.111332	0.322628	0.34718	25	0.412599	1.18882	1.30807	35	0.540402	1.612	1.7206	17	0.267096
S100A6	1	complement(153534599..153536244)	ENSG00000197956	428.015	1.44665	0.532721	1.21792e-07	4.8435e-05	0.00261549	328.545	1.31349	0.393406	0.000100041	0.0716124	1	19845	384.691	1172.5	348.747	9373	416.704	1243.62	395.936	10593	482.651	1408.75	463.201	7153	295.29	869.647	271.98	4990	277.7	807.287	264.777	6013	318.965	924.326	298.227	6353	349.701	1007.6	332.406	5922	304.963	909.697	291.125	6316	330.971
S100A4	1	complement(153543613..153550136)	ENSG00000196154	63.8669	1.73012	0.790871	1.13687e-13	1.87802e-10	2.44142e-09	43.1115	1.49126	0.576536	0.000593321	0.260032	1	3173	64.1111	195.404	55.7609	1176	54.4951	162.636	49.6768	1537	72.9945	213.054	67.2085	953	41.0068	120.767	36.2361	508	29.4673	85.6629	26.9553	736	40.6941	117.927	36.5035	950	54.5059	157.048	49.7066	753	40.4181	120.566	37.0174	630	34.4105
FAM131C	1	complement(16057769..16073632)	ENSG00000185519	5.38948	1.52406	0.607923	0.000306207	0.0273992	1	5.24618	1.56718	0.648174	0.000991999	0.367296	1	522	5.14599	15.6845	9.17339	260	5.87841	17.5436	10.983	222	5.14405	15.0143	9.70741	149	3.12813	9.21252	5.66546	140	3.96224	11.5184	7.42862	131	3.53395	10.241	6.49722	146	4.08704	11.776	7.63912	219	5.73537	17.1084	10.766	222	5.91615
F13B	1	complement(197039191..197067267)	ENSG00000143278	1.26092	-2.37142	-1.24575	1.38186e-05	0.00228272	0.296754	1.74519	-1.29215	-0.369773	0.199808	0.999875	1	61	0.459761	1.40131	1.07199	41	0.708719	2.11512	1.73193	27	0.478321	1.39611	1.18063	89	1.42854	4.20713	3.38406	64	1.38483	4.02577	3.39594	47	0.969374	2.80914	2.33106	53	1.13432	3.26833	2.77311	50	1.00113	2.98635	2.45799	90	1.83372
NPPB	1	complement(11857464..11858931)	ENSG00000120937	2.29218	-2.35974	-1.23863	0.000706863	0.049441	1	2.39774	1.10222	0.140411	0.718121	0.999875	1	31	0.746398	2.27495	0.54478	25	1.3805	4.11999	1.05606	16	0.905487	2.64291	0.699633	48	2.46122	7.24843	1.82511	41	2.83405	8.23871	2.17552	24	1.58129	4.5824	1.19033	26	1.77762	5.12188	1.36039	46	2.94229	8.77676	2.26135	38	2.47332
FGGY	1	59296638..59810647	ENSG00000172456	0.610377	-1.70038	-0.765855	3.98367e-05	0.00555515	0.855493	0.641687	-1.29947	-0.377922	0.052055	0.999875	1	196	0.340164	1.03679	3.44442	95	0.378132	1.12851	4.01301	95	0.387533	1.13112	4.15407	167	0.617232	1.81778	6.34987	114	0.568004	1.65121	6.04902	136	0.645895	1.87173	6.7452	99	0.487893	1.40577	5.17995	99	0.456442	1.36155	4.86683	108	0.506691
TSTD1	1	complement(161037631..161038990)	ENSG00000215845	32.8375	-1.44961	-0.535665	1.63662e-06	0.000408679	0.0351464	30.7589	-1.14856	-0.199823	0.0805372	0.999875	1	928	21.0974	64.3028	16.3083	413	21.5337	64.2656	17.446	475	25.3821	74.0846	20.7704	715	34.6168	101.948	27.1866	429	27.9997	81.3963	22.7634	577	35.8961	104.023	28.6175	486	31.3743	90.3992	25.4289	389	23.4936	70.0806	19.1232	391	24.0295
NR1I3	1	complement(161229666..161238302)	ENSG00000143257	9.93323	-1.44537	-0.531435	2.41308e-06	0.000537751	0.051821	10.1347	-1.0263	-0.0374538	0.741503	0.999875	1	868	6.4924	19.7882	15.2538	415	7.11903	21.2462	17.5305	397	6.97957	20.3718	17.3597	542	8.63345	25.426	20.6086	552	11.8533	34.458	29.29	455	9.31296	26.9879	22.5667	392	8.32585	23.9893	20.5105	483	9.59733	28.6286	23.7442	550	11.1208
CAPN8	1	complement(223538007..223665734)	ENSG00000203697	4.72856	2.35607	1.23638	0	0	0	2.22438	1.35273	0.435873	0.0324078	0.999875	1	1272	4.76563	14.5252	22.3536	589	5.061	15.1042	24.8807	495	4.35905	12.7231	21.6449	265	2.11436	6.22692	10.0761	208	2.23723	6.50374	11.0368	163	1.67114	4.84277	8.08433	257	2.73416	7.87796	13.4469	236	2.3489	7.00669	11.6017	157	1.59009
HIST2H2AA3	1	complement(149842188..149842736)	ENSG00000203812	3.1538	39.5613	5.30602	2.81964e-06	0.000611633	0.0605517	0.204326	-1.43237	-0.518407	0.689014	0.999875	1	0	0	0	0	72	5.02593	14.9995	3.04144	62	4.43548	12.9462	2.71108	2	0.129636	0.381786	0.0760464	1	0.0873797	0.254017	0.0530615	0	0	0	0	0	0	0	0	5	0.404282	1.20596	0.245799	0	0
RGPD5	2	109792758..109857695	ENSG00000015568	1.64261	1.15611	0.209274	0.423525	0.99988	1	2.15065	-2.62492	-1.39227	1.91459e-07	0.00137053	0.00411158	815	1.65896	5.05635	14.3224	444	2.07276	6.18598	18.7555	250	1.19611	3.49117	10.9318	147	0.637229	1.87668	5.58941	353	2.06285	5.99679	18.7307	279	1.55408	4.50355	13.8376	75	0.433508	1.24907	3.92421	126	0.681345	2.03243	6.19415	234	1.2876
ODC1	2	complement(10439968..10448504)	ENSG00000115758	46.6352	-1.45465	-0.540676	5.32907e-15	1.27158e-11	1.14442e-10	52.2233	-1.24405	-0.315049	5.55309e-06	0.00917328	0.119253	5545	31.2181	95.1496	97.4453	2680	34.604	103.273	113.209	2280	30.1712	88.0628	99.6978	3920	46.9992	138.415	149.051	3043	49.1837	142.979	161.466	2838	43.7228	126.704	140.757	2551	40.7824	117.507	133.475	2803	41.9224	125.053	137.795	2688	40.9092
SULT1C2	2	108288639..108309915	ENSG00000198203	5.12355	-1.52333	-0.607228	1.86837e-06	0.000450822	0.0401232	4.92765	-1.15622	-0.209413	0.0856505	0.999875	1	655	3.73289	11.3775	11.5107	263	3.43754	10.2591	11.1097	214	2.86663	8.36703	9.3576	494	5.99558	17.6573	18.7835	288	4.71206	13.6982	15.2817	299	4.66301	13.5129	14.8295	279	4.51509	13.0094	14.598	261	3.95151	11.7872	12.8307	266	4.09801
AQP12B	2	complement(240676418..240682906)	ENSG00000185176	4.24813	-1.49962	-0.584593	6.82354e-05	0.00850636	1	3.51644	1.03376	0.0478975	0.701319	0.999875	1	502	2.53959	7.74042	8.82192	223	2.58733	7.72169	9.42001	285	3.38889	9.8914	12.4622	363	3.91081	11.5175	13.8024	287	4.16827	12.1174	15.2287	337	4.66531	13.5196	16.7142	261	3.74936	10.8031	13.6562	276	3.70926	11.0646	13.5681	226	3.09069
LY75-CD302	2	complement(159771851..159904710)	ENSG00000248672	1.88659	1.83477	0.875599	0.000146998	0.0154993	1	1.63149	-1.79146	-0.841135	0.0196366	0.999875	1	602	1.7804	5.42647	10.5793	162	1.09881	3.27931	6.84324	400	2.78057	8.11583	17.4908	160	1.00772	2.96779	6.08371	125	1.06132	3.08529	6.63269	127	1.02781	2.97849	6.29883	166	1.39407	4.01675	8.68557	133	1.04494	3.11702	6.53826	32	0.255833
ALPPL2	2	232406843..232410714	ENSG00000163286	10.4149	2.11079	1.07778	2.46419e-10	1.76395e-07	5.29185e-06	4.83615	1.17707	0.235205	0.260543	0.999875	1	1830	12.2658	37.3851	32.1596	508	7.80903	23.3054	21.459	709	11.1698	32.6021	31.0025	454	6.4804	19.0852	17.2625	177	3.40591	9.90115	9.39189	270	4.95223	14.351	13.3912	349	6.64246	19.139	18.2606	224	3.98853	11.8977	11.0118	214	3.87746
ALPP	2	232378534..232382889	ENSG00000163283	26.8853	2.12745	1.08913	2.95763e-13	4.23435e-10	6.35152e-09	14.865	1.39741	0.482758	0.017534	0.999875	1	5648	31.7658	96.8192	99.2554	1760	22.7021	67.7526	74.3463	1981	26.1881	76.4369	86.6234	1436	17.1997	50.654	54.6013	586	9.46189	27.5061	31.0941	738	11.3583	32.9151	36.6026	1345	21.4805	61.8921	70.3741	793	11.8483	35.3432	38.9838	741	11.266
CHRNA1	2	complement(174747592..174787935)	ENSG00000138435	1.39831	2.25467	1.17292	2.14175e-07	7.54002e-05	0.00459941	0.908865	1.50197	0.586859	0.04182	0.999875	1	299	1.64837	5.02406	5.25449	102	1.28964	3.84884	4.30871	97	1.25692	3.66866	4.24153	50	0.587019	1.72881	1.90116	44	0.696385	2.02442	2.33471	43	0.648697	1.87985	2.13267	58	0.907962	2.61612	3.03472	56	0.820141	2.44646	2.75295	67	0.998492
TMEM207	3	complement(190428655..190449876)	ENSG00000198398	23.2585	-1.51413	-0.598493	3.43446e-05	0.00498344	0.73755	27.849	-1.3333	-0.415002	0.000137899	0.0955281	1	1153	13.3054	40.5537	20.2623	698	18.4732	55.1319	29.4851	524	14.213	41.4843	22.913	994	24.4279	71.9416	37.7951	815	27.0005	78.4917	43.2452	581	18.3471	53.1678	28.8159	593	19.4317	55.9889	31.0274	668	20.4783	61.0863	32.8388	692	21.587
ADAMTS9	3	complement(64515654..64688000)	ENSG00000163638	0.820293	-1.54212	-0.624917	0.000521461	0.0404273	1	0.828307	-1.23768	-0.307641	0.0746799	0.999875	1	300	0.564072	1.71924	5.27206	115	0.495905	1.47999	4.85785	119	0.525912	1.53502	5.20352	214	0.856893	2.5236	8.13696	178	0.960832	2.79318	9.44495	125	0.643153	1.86379	6.19964	123	0.656713	1.89219	6.4357	143	0.714278	2.13067	7.02986	117	0.594684
SLC6A20	3	complement(45755450..45796535)	ENSG00000163817	3.14368	1.68856	0.755798	2.11257e-10	1.56439e-07	4.53674e-06	2.16791	1.15496	0.207848	0.0988413	0.999875	1	1055	3.25073	9.90792	18.5401	439	3.10228	9.25851	18.5443	425	3.07802	8.98402	18.584	288	1.88982	5.56564	10.9507	213	1.88418	5.4774	11.3021	217	1.8297	5.30226	10.7626	245	2.14364	6.17649	12.8191	263	2.1528	6.42173	12.929	265	2.2073
AC104662.2	4	25160663..25277306	ENSG00000281028	0.644354	-2.54621	-1.34835	0.0258987	0.44391	1	0.751026	28.1946	4.81735	7.40639e-06	0.00994077	0.159052	28	0.337083	1.0274	0.492059	15	0.41415	1.236	0.633633	0	0	0	0	18	0.461478	1.35908	0.684418	34	1.17509	3.41605	1.80409	9	0.296492	0.8592	0.446374	33	1.12811	3.25042	1.72665	25	0.799534	2.38499	1.229	10	0.325436
SULT1E1	4	complement(69841212..69860152)	ENSG00000109193	9.6599	-1.48345	-0.568955	9.9737e-07	0.000274596	0.0214185	10.1396	-1.4152	-0.501008	2.85659e-05	0.029212	0.613452	663	6.22389	18.9698	11.6513	340	7.32006	21.8462	14.3624	275	6.06784	17.7106	12.0249	512	10.2357	30.1448	19.4679	380	10.2411	29.7713	20.1634	331	8.50291	24.6405	16.4166	228	6.07772	17.5118	11.9296	284	7.08247	21.1268	13.9614	311	7.89216
INTU	4	127623271..127726737	ENSG00000164066	0.260076	-1.76158	-0.816867	0.000207031	0.020209	1	0.211805	-1.08049	-0.111683	0.654076	0.999875	1	163	0.170785	0.520536	2.86449	45	0.108134	0.322717	1.9009	61	0.150226	0.438475	2.66735	129	0.28784	0.847707	4.90499	76	0.228607	0.664572	4.03268	92	0.263779	0.764404	4.56293	50	0.148761	0.428627	2.61614	73	0.20319	0.606111	3.58867	79	0.223757
ADH6	4	complement(99202638..99219537)	ENSG00000172955	1.86787	-1.74271	-0.80133	2.59669e-05	0.00392704	0.557639	1.74274	-1.42431	-0.510262	0.0152351	0.999875	1	264	1.16857	3.56169	4.63942	74	0.751226	2.24198	3.12592	122	1.2693	3.7048	5.3347	198	1.86645	5.4968	7.52859	133	1.69012	4.91326	7.05718	169	2.04705	5.93213	8.38191	70	0.879846	2.53511	3.66259	131	1.54043	4.59505	6.43994	98	1.17264
FABP2	4	complement(119317250..119322390)	ENSG00000145384	4.93889	-1.52286	-0.606783	7.58932e-05	0.00910507	1	5.20518	-1.22486	-0.292623	0.0908528	0.999875	1	602	4.05942	12.3727	10.5793	176	2.72187	8.1232	7.43463	178	2.82124	8.23455	7.78342	361	5.18411	15.2675	13.7264	265	5.13012	14.9135	14.0613	244	4.50244	13.0476	12.1017	171	3.27432	9.43431	8.94719	222	3.97684	11.8628	10.9135	286	5.21339
APELA	4	164877004..164898965	ENSG00000248329	2.43232	-1.49154	-0.576799	0.000537733	0.04139	1	2.61396	-1.34618	-0.428875	0.015305	0.999875	1	291	1.57414	4.79783	5.1139	136	1.68724	5.03544	5.74494	139	1.76733	5.15844	6.07806	240	2.76479	8.14245	9.12557	146	2.26735	6.59128	7.74698	153	2.26482	6.56319	7.58835	141	2.16584	6.24046	7.37751	117	1.68134	5.01538	5.75171	128	1.87175
AC116366.3	5	132410832..132646079	ENSG00000283782	0.611556	1.64647	0.719373	0.248142	0.99988	1	1.16539	-1.92469	-0.944628	2.77227e-05	0.029212	0.595345	352	0.691652	2.10809	6.18589	186	0.838196	2.50153	7.85705	66	0.304819	0.889697	2.88599	106	0.443558	1.30631	4.03046	0	0	0	0	126	0.677496	1.96331	6.24923	114	0.636074	1.83272	5.96479	142	0.741228	2.21106	6.9807	76	0.403688
SLC12A2	5	128083766..128189688	ENSG00000064651	7.04543	1.48583	0.571273	2.56429e-05	0.00390554	0.550682	5.54741	1.01665	0.0238175	0.825329	0.999875	1	3901	9.37772	28.5824	68.5544	1070	5.89919	17.6057	45.1992	1037	5.8594	17.1022	45.345	1077	5.51362	16.2379	40.951	623	4.29955	12.499	33.0573	671	4.41402	12.7914	33.2796	870	5.93879	17.1115	45.5208	913	5.83056	17.3924	44.883	748	4.86083
CCDC152	5	42756801..42802360	ENSG00000198865	0.626122	2.76365	1.46658	4.33862e-06	0.000870766	0.0931719	0.500587	1.43859	0.524651	0.214578	0.999875	1	145	0.70618	2.15237	2.54816	66	0.737189	2.20008	2.78799	38	0.434995	1.26965	1.66163	25	0.259291	0.763627	0.95058	13	0.181763	0.528393	0.6898	18	0.239889	0.695173	0.892748	53	0.732961	2.11189	2.77311	35	0.452829	1.35078	1.7206	24	0.31597
RANBP3L	5	complement(36248434..36302114)	ENSG00000164188	0.255258	7.04812	2.81724	1.17394e-06	0.000307443	0.0252103	0.11297	2.6305	1.39534	0.0489309	0.999875	1	66	0.327933	0.999509	1.15985	21	0.239303	0.714181	0.887086	17	0.198538	0.579487	0.74336	3	0.0317441	0.0934881	0.11407	2	0.028529	0.082935	0.106123	4	0.0543867	0.157607	0.198388	7	0.0987636	0.284568	0.366259	7	0.092397	0.275618	0.344119	11	0.147748
COL12A1	6	complement(75084326..75206051)	ENSG00000111799	15.9932	1.76429	0.819087	7.77156e-16	2.3842e-12	1.66894e-11	11.8843	1.30577	0.384904	0.000168803	0.10985	1	13573	18.4436	56.2142	238.526	5169	16.1088	48.0755	218.35	4204	13.4272	39.1909	183.829	3347	9.68556	28.5245	127.264	2387	9.31185	27.07	126.658	2211	8.22146	23.8249	109.659	2739	10.5686	30.4515	143.312	3485	12.5803	37.5266	171.322	3404	12.5039
SLC18B1	6	complement(132769370..132798553)	ENSG00000146409	29.5488	1.44665	0.532716	2.05169e-13	3.14715e-10	4.40601e-09	24.2608	1.31266	0.392491	0.000216344	0.129055	1	4698	33.1512	101.042	82.5605	1776	28.742	85.7783	75.0222	1613	26.7531	78.0862	70.5318	1282	19.2652	56.7373	48.7457	1087	22.0207	64.0151	57.6779	1048	20.2367	58.6436	51.9777	1082	21.6806	62.4685	56.6132	1335	25.0257	74.651	65.6284	1367	26.0761
ADGRF2	6	47656436..47697797	ENSG00000164393	2.27134	1.90233	0.92777	4.41684e-09	2.31345e-06	9.48516e-05	1.52508	1.49216	0.577406	0.000411371	0.205446	1	737	1.92573	5.86944	12.9517	415	2.48693	7.42204	17.5305	391	2.40136	7.00903	17.0973	195	1.08508	3.19563	7.41452	142	1.0652	3.09658	7.53474	201	1.43719	4.16482	9.96901	212	1.57297	4.53222	11.0924	229	1.58958	4.74166	11.2576	200	1.41268
GSTA1	6	complement(52791664..52803910)	ENSG00000243955	542.112	-1.46002	-0.545991	6.02647e-05	0.0076579	1	612.098	-1.06403	-0.0895379	0.507899	0.999875	1	26158	428.942	1307.37	459.689	10517	395.525	1180.41	444.261	7532	290.307	847.34	329.352	15447	539.434	1588.66	587.344	13351	628.525	1827.15	708.425	10215	458.378	1328.33	506.634	10415	484.965	1397.33	544.941	11047	481.235	1435.51	543.069	16341	724.369
GSTA2	6	complement(52750089..52763569)	ENSG00000244067	279.552	-1.45239	-0.538434	8.81812e-08	3.64172e-05	0.00189369	289.623	-1.11088	-0.151709	0.13199	0.999875	1	15788	200.924	612.395	277.451	6760	197.305	588.841	285.557	5945	177.831	519.049	259.958	11157	302.378	890.522	424.225	7800	284.979	828.447	413.88	7216	251.299	728.237	357.893	6781	245.05	706.065	354.8	6626	224.013	668.225	325.733	8645	297.41
PRSS35	6	83512538..83525704	ENSG00000146250	6.35722	1.46462	0.550523	3.60114e-06	0.000750821	0.0773346	4.96696	1.09508	0.131041	0.328997	0.999875	1	983	6.73181	20.5179	17.2748	428	6.72218	20.0618	18.0797	349	5.61768	16.3967	15.2608	321	4.68148	13.7872	12.2054	203	3.99107	11.6022	10.7715	234	4.38516	12.7077	11.6057	238	4.62821	13.3353	12.4528	295	5.36684	16.0091	14.5022	265	4.90582
AL662899.1	6	complement(31686962..31714072)	ENSG00000204422	0.330583	4.39691	2.13649	0.000586466	0.0432796	1	0.206799	2.56028	1.3563	0.0836688	0.999875	1	66	0.472916	1.4414	1.15985	8	0.131467	0.392353	0.337938	23	0.387365	1.13063	1.00572	4	0.0610379	0.17976	0.152093	8	0.164568	0.478405	0.424492	0	0	0	0	4	0.0813874	0.234502	0.209291	10	0.190352	0.567815	0.491599	18	0.348658
AC105052.1	7	complement(102582523..102642869)	ENSG00000205236	0.508479	1.17534	0.233081	0.680551	0.99988	1	0.613712	-12.3975	-3.63198	1.39981e-08	0.000150304	0.000300609	156	0.730376	2.22611	2.74147	31	0.332867	0.993416	1.30951	42	0.462194	1.34904	1.83654	73	0.727854	2.14357	2.77569	0	0	0	0	45	0.576535	1.67073	2.23187	0	0	0	0	0	0	0	0	11	0.13922
AGFG2	7	100539211..100568219	ENSG00000106351	20.337	1.66672	0.737014	1.01319e-12	1.23714e-09	2.17582e-08	16.4991	1.39343	0.478644	4.67229e-06	0.00836145	0.100337	6304	21.7505	66.2935	110.784	2755	21.8003	65.0614	116.377	2153	17.4603	50.9625	94.1444	1650	12.1238	35.7052	62.7383	1324	13.1146	38.1249	70.2535	1212	11.4432	33.1611	60.1117	1505	14.7451	42.4852	78.7457	1796	16.4618	49.1052	88.2911	1961	18.2902
CLIP2	7	74289475..74405943	ENSG00000106665	17.1327	1.48757	0.572961	6.66134e-16	2.3842e-12	1.43052e-11	14.1584	1.1906	0.251687	0.000497064	0.227116	1	6190	18.4307	56.1749	108.78	2488	16.9898	50.7048	105.099	2283	15.9775	46.6348	99.8289	1764	11.1853	32.9415	67.0729	1411	12.0612	35.0626	74.8698	1412	11.5047	33.3394	70.0311	1600	13.5278	38.9778	83.7164	1944	15.3768	45.8685	95.5668	1686	13.5705
AKR1B1	7	complement(134442350..134459284)	ENSG00000085662	12.0947	1.75584	0.812163	1.13376e-12	1.28145e-09	2.43475e-08	9.02194	1.29642	0.374529	0.00160397	0.485144	1	1338	11.2689	34.3466	23.5134	757	14.6221	43.6385	31.9774	525	10.393	30.3347	22.9567	387	6.94125	20.4424	14.715	300	7.25375	21.087	15.9185	282	6.4993	18.8343	13.9864	349	8.3466	24.0491	18.2606	394	8.81538	26.296	19.369	435	9.90383
ADCY1	7	45574140..45723116	ENSG00000164742	1.51068	1.46437	0.550283	1.84777e-06	0.000450822	0.0396808	1.04161	1.05534	0.0777109	0.622706	0.999875	1	1098	1.41831	4.32287	19.2958	513	1.51975	4.53559	21.6703	525	1.59397	4.65244	22.9567	352	0.968302	2.85171	13.3842	281	1.04205	3.02929	14.9103	305	1.0781	3.12422	15.1271	262	0.961008	2.76896	13.7086	366	1.25594	3.74642	17.9925	260	0.907881
FAM131B	7	complement(143353400..143362770)	ENSG00000159784	1.44861	1.553	0.63506	0.000186752	0.0189174	1	1.12764	1.38351	0.468331	0.0116488	0.999875	1	513	1.3652	4.16099	9.01523	226	1.37935	4.11656	9.54674	256	1.60129	4.67381	11.1941	179	1.01445	2.98761	6.80615	105	0.802198	2.33203	5.57146	129	0.939417	2.72233	6.39802	137	1.03528	2.98295	7.16822	154	1.08872	3.24763	7.57062	175	1.25893
KHDRBS3	8	135457457..135656722	ENSG00000131773	2.56294	1.59556	0.674064	0.00019409	0.0194076	1	2.59696	1.4298	0.515814	0.00507744	0.919862	1	573	3.19795	9.74703	10.0696	192	2.45757	7.33441	8.1105	155	2.0333	5.93473	6.7777	136	1.61642	4.76046	5.17116	103	1.65032	4.79756	5.46534	106	1.61888	4.69132	5.25729	130	2.06024	5.93618	6.80196	183	2.71323	8.09348	8.99626	200	3.01741
ANK1	8	complement(41653220..41896762)	ENSG00000029534	0.297335	2.44297	1.28864	0.000399924	0.0332882	1	0.137979	1.23443	0.30385	0.420981	0.999875	1	218	0.39228	1.19563	3.83103	35	0.144443	0.431078	1.47848	84	0.355281	1.03698	3.67308	38	0.145621	0.428861	1.44488	12	0.061992	0.180213	0.636738	32	0.157573	0.456628	1.58711	32	0.163511	0.471126	1.67433	30	0.14341	0.427788	1.4748	22	0.107016
TMEFF1	9	100473113..100577636	ENSG00000241697	0.575357	-2.96417	-1.56763	0.000148383	0.015544	1	0.619833	4.10657	2.03793	3.77077e-06	0.00836145	0.0809773	40	0.255989	0.78023	0.702942	7	0.102742	0.306625	0.295695	13	0.19555	0.570766	0.568452	39	0.531528	1.56538	1.4829	45	0.826777	2.40348	2.38777	21	0.367766	1.06575	1.04154	24	0.436144	1.25667	1.25575	42	0.714051	2.12999	2.06472	41	0.709304
ELP1	9	complement(108867517..108934116)	ENSG00000070061	17.9958	1.63262	0.707189	6.68787e-12	6.83915e-09	1.43622e-07	15.9327	1.39243	0.477603	4.169e-06	0.00836145	0.0895292	6285	17.4801	53.2776	110.45	3234	20.6284	61.5639	136.611	2429	15.8789	46.3467	106.213	1759	10.4185	30.683	66.8828	1658	13.2385	38.4848	87.976	1244	9.46782	27.4367	61.6988	1694	13.3786	38.5477	88.6347	2314	17.097	50.9999	113.756	2304	17.3224
PTGS1	9	122370530..122395703	ENSG00000095303	0.218454	4.46364	2.15822	1.58691e-06	0.000400929	0.034079	0.128443	1.92774	0.946911	0.0824042	0.999875	1	82	0.240512	0.733056	1.44103	34	0.228712	0.682572	1.43624	27	0.18614	0.543299	1.18063	8	0.0499703	0.147165	0.304186	9	0.0757843	0.220308	0.477554	3	0.0240788	0.0697776	0.148791	17	0.141589	0.407961	0.889487	15	0.116878	0.348643	0.737398	16	0.126861
AKR1C1	10	4963253..4983283	ENSG00000187134	105.211	1.72484	0.786459	4.44089e-15	1.1921e-11	9.53682e-11	80.1737	1.41738	0.503222	5.51594e-07	0.00203344	0.0118455	45492	107.412	327.382	799.456	20024	108.432	323.607	845.858	17981	99.7898	291.263	786.257	11990	60.289	177.555	455.898	9403	63.7382	185.29	498.938	9195	59.4103	172.165	456.045	11441	76.708	221.019	598.624	12209	76.5804	228.437	600.193	13667	87.2328
AKR1C2	10	complement(4987400..5018031)	ENSG00000151632	94.9608	1.55949	0.641078	1.88602e-10	1.44651e-07	4.05023e-06	70.4218	1.29983	0.378328	0.000180093	0.11375	1	25968	99.4767	303.195	456.35	10451	91.8181	274.024	441.473	10394	93.5877	273.161	454.499	7904	64.4807	189.899	300.535	5312	58.4191	169.827	281.863	5746	60.2337	174.551	284.985	6809	74.0668	213.409	356.266	6488	66.0255	196.952	318.949	6873	71.1732
DUSP5	10	110497838..110511544	ENSG00000138166	15.9493	1.48185	0.567397	1.34491e-07	5.25128e-05	0.0028882	15.4746	1.33681	0.4188	0.00138128	0.43622	1	2287	14.9453	45.5517	40.1907	1150	17.2355	51.4379	48.5785	1020	15.6672	45.7289	44.6016	828	11.5231	33.9361	31.4832	574	10.7687	31.3052	30.4573	557	9.96056	28.8646	27.6256	708	13.138	37.8545	37.0445	855	14.843	44.2763	42.0317	1044	18.4427
MSMB	10	complement(46033307..46046269)	ENSG00000263639	12.4834	2.11343	1.07958	8.73213e-05	0.0099746	1	7.04928	1.82667	0.869216	0.00200363	0.551642	1	279	9.47562	28.8808	4.90302	147	11.4501	34.1718	6.2096	207	16.5244	48.231	9.05151	56	4.05034	11.9285	2.1293	46	4.48513	13.0385	2.44083	100	9.29382	26.9325	4.95971	79	7.61882	21.9522	4.1335	95	8.57127	25.5679	4.67019	54	4.95775
TMEM236	10	17752252..17800868	ENSG00000148483	1.09841	-1.86588	-0.89986	0.000272627	0.0249135	1	1.23745	-1.24955	-0.321413	0.175644	0.999875	1	121	0.370035	1.12783	2.1264	109	0.76449	2.28156	4.6044	89	0.639736	1.86724	3.89171	134	0.872695	2.57014	5.09511	132	1.1589	3.36898	7.00412	151	1.26365	3.66191	7.48916	100	0.86839	2.5021	5.23227	126	1.02364	3.05348	6.19415	124	1.0251
NDUFC2-KCTD14	11	complement(78016971..78079865)	ENSG00000259112	1.8539	-1.14437	-0.194555	0.759989	0.99988	1	2.02565	3.69033	1.88375	3.98582e-05	0.038907	0.855954	76	1.53745	4.68601	1.33559	13	0.603141	1.80003	0.549149	56	2.66274	7.77194	2.44872	52	2.24022	6.59759	1.97721	0	0	0	0	60	3.32147	9.62526	2.97583	36	2.06799	5.95851	1.88362	40	2.14964	6.41233	1.9664	34	1.85932
BBOX1	11	27040725..27127809	ENSG00000129151	2.61832	-1.89074	-0.918948	0.000147235	0.0154993	1	2.92712	-1.10245	-0.140716	0.49133	0.999875	1	185	1.34346	4.09472	3.25111	107	1.78206	5.31843	4.51992	60	1.02413	2.98921	2.62363	141	2.18057	6.42191	5.36127	174	3.62757	10.5455	9.23271	103	2.04682	5.93146	5.1085	88	1.81465	5.22855	4.6044	140	2.70084	8.05651	6.88238	167	3.27835
APOC3	11	116829706..116833072	ENSG00000110245	900.696	-1.45237	-0.538406	7.80993e-08	3.28859e-05	0.00167718	978.047	-1.08091	-0.112249	0.262798	0.999875	1	28056	580.207	1768.41	493.043	13870	657.841	1963.27	585.899	12693	616.985	1800.84	555.028	19260	848.229	2498.08	732.327	16428	975.34	2835.36	871.695	15524	878.52	2545.85	769.945	13615	799.525	2303.68	712.374	15135	831.491	2480.32	744.035	18475	1032.83
FXYD2	11	complement(117800844..117828698)	ENSG00000137731	4.64039	1.81768	0.862099	9.02008e-05	0.010249	1	3.08912	1.51419	0.598543	0.0217789	0.999875	1	351	5.48653	16.7224	6.16832	100	3.58491	10.6989	4.22422	132	4.84973	14.1553	5.77198	79	2.62977	7.74482	3.00383	44	1.9745	5.73997	2.33471	73	3.12252	9.0487	3.62059	71	3.15142	9.08021	3.71491	73	3.03132	9.04234	3.58867	73	3.08461
BEST1	11	61949821..61965515	ENSG00000167995	0.816491	1.94027	0.956255	0.00040317	0.0333388	1	0.616618	1.04533	0.0639567	0.817372	0.999875	1	236	0.750854	2.28853	4.14736	159	1.16019	3.46249	6.71651	72	0.53843	1.57155	3.14835	57	0.386205	1.1374	2.16732	58	0.529768	1.54006	3.07757	40	0.348253	1.0092	1.98388	81	0.731789	2.10851	4.23814	58	0.490219	1.46231	2.85127	73	0.627847
EHF	11	34621093..34661057	ENSG00000135373	0.782789	2.50448	1.32451	1.0281e-05	0.00176628	0.220785	0.527837	1.13148	0.178207	0.559652	0.999875	1	261	1.08005	3.29188	4.5867	66	0.626374	1.86936	2.78799	66	0.641947	1.8737	2.88599	34	0.299627	0.882419	1.29279	35	0.4158	1.20875	1.85715	21	0.2378	0.689119	1.04154	48	0.564028	1.62514	2.51149	50	0.549655	1.63961	2.45799	42	0.469828
SLC6A12	12	complement(190077..214570)	ENSG00000111181	1.54226	2.51019	1.3278	4.39837e-08	1.96781e-05	0.000944549	0.839363	1.8506	0.887994	0.00104638	0.379419	1	482	2.06727	6.30083	8.47045	128	1.25906	3.75757	5.407	129	1.30045	3.7957	5.64079	72	0.65763	1.93676	2.73767	32	0.394016	1.14542	1.69797	68	0.798085	2.31276	3.3726	53	0.64548	1.85983	2.77311	86	0.979865	2.92291	4.22775	77	0.892745
AC023055.1	12	complement(55757275..55827546)	ENSG00000257390	0.158993	-13.6894	-3.77499	0.000635028	0.0457625	1	0.302539	-3.84212	-1.9419	0.0191144	0.999875	1	2	0.0131884	0.0401969	0.0351471	1	0.0151234	0.0451346	0.0422422	0	0	0	0	3	0.0421292	0.124073	0.11407	2	0.0378622	0.110067	0.106123	22	0.396986	1.15042	1.09114	0	0	0	0	12	0.210214	0.627062	0.589919	1	0.0178258
MYRFL	12	69825304..69959097	ENSG00000166268	2.39129	-1.65584	-0.72756	6.8822e-06	0.00128423	0.147795	2.78867	-1.21238	-0.277842	0.0989016	0.999875	1	341	1.61691	4.9282	5.99258	130	1.41372	4.21914	5.49149	104	1.15909	3.38313	4.54762	242	2.4437	7.19683	9.20161	174	2.36862	6.8857	9.23271	182	2.36154	6.84348	9.02667	131	1.76385	5.08219	6.85428	211	2.65787	7.92834	10.3727	182	2.33287
HAL	12	complement(95972662..95996365)	ENSG00000084110	4.73107	-1.56592	-0.647013	1.30674e-08	6.23605e-06	0.000280622	4.61764	-1.20503	-0.269068	0.0203349	0.999875	1	816	3.04559	9.28266	14.34	385	3.29556	9.83535	16.2632	307	2.69323	7.86091	13.4242	528	4.19677	12.3597	20.0762	504	5.4004	15.6992	26.743	450	4.59605	13.3188	22.3187	302	3.2007	9.22222	15.8015	417	4.13462	12.3335	20.4997	390	3.9349
SLC15A1	13	complement(98683801..98752654)	ENSG00000088386	17.4932	-1.48814	-0.573512	5.27044e-08	2.30985e-05	0.00113183	20.0704	-1.30661	-0.385826	0.0027414	0.676685	1	1842	9.90961	30.2035	32.3705	1049	12.9428	38.6269	44.3121	975	12.3289	35.9853	42.6339	1330	15.2377	44.8758	50.5709	1318	20.3562	59.1764	69.9351	1147	16.8858	48.9332	56.8879	883	13.4892	38.8664	46.201	1120	16.0068	47.7477	55.0591	1085	15.7792
ALOX5AP	13	30713478..30764426	ENSG00000132965	1.52605	-2.36527	-1.242	3.65818e-05	0.00517394	0.785595	1.44361	1.14647	0.197199	0.589355	0.999875	1	50	0.658899	2.00826	0.878677	25	0.755573	2.25495	1.05606	17	0.526564	1.53692	0.74336	58	1.62771	4.7937	2.20535	37	1.3998	4.06928	1.96328	43	1.55063	4.49356	2.13267	23	0.860665	2.47984	1.20342	34	1.19027	3.55055	1.67144	64	2.2799
EDNRB	13	complement(77895481..77975529)	ENSG00000136160	4.0594	1.70892	0.773085	1.49893e-11	1.28758e-08	3.21896e-07	2.51941	1.28838	0.365554	0.0192089	0.999875	1	1536	4.57751	13.9518	26.993	615	4.2034	12.5447	25.979	485	3.39729	9.91591	21.2076	388	2.46246	7.25209	14.753	264	2.25869	6.56611	14.0082	300	2.44653	7.08977	14.8791	346	2.928	8.43647	18.1037	304	2.40674	7.17925	14.9446	276	2.22349
GPX2	14	complement(64939152..64942905)	ENSG00000176153	20.1592	2.13317	1.093	0	0	0	14.0057	1.51637	0.600622	3.24588e-07	0.00174263	0.00697053	1928	21.4918	65.5051	33.8818	827	21.1427	63.0986	34.9343	681	17.843	52.0795	29.7781	355	8.42743	24.8193	13.4982	367	11.7448	34.1428	19.4736	271	8.2666	23.9557	13.4408	426	13.4845	38.8529	22.2895	413	12.2302	36.4825	20.303	541	16.3024
GALNT16	14	69259277..69357033	ENSG00000100626	0.583061	-1.81575	-0.860566	8.16869e-06	0.00144977	0.175423	0.605626	-1.45786	-0.543853	0.00578412	0.970421	1	203	0.34098	1.03927	3.56743	78	0.300479	0.896757	3.29489	74	0.292158	0.852741	3.2358	142	0.50795	1.49594	5.39929	123	0.593133	1.72427	6.52657	141	0.648101	1.87813	6.99319	85	0.405423	1.16815	4.44743	107	0.477457	1.42424	5.26011	75	0.34055
SLC7A8	14	complement(23125295..23183674)	ENSG00000092068	7.64571	1.57656	0.656776	1.46577e-09	8.99356e-07	3.14775e-05	5.76682	1.10841	0.148493	0.181665	0.999875	1	2370	8.07709	24.6182	41.6493	1110	8.67595	25.8927	46.8889	772	6.18411	18.05	33.7573	659	4.7829	14.0859	25.0573	498	4.87248	14.1645	26.4246	529	4.93348	14.2967	26.2369	572	5.53554	15.9496	29.9286	636	5.75814	17.1764	31.2657	652	6.00678
SERPINA5	14	94561442..94593120	ENSG00000188488	4.05102	2.14996	1.10431	0	0	0	2.51874	1.33527	0.417132	0.0173311	0.999875	1	871	4.34322	13.2377	15.3066	357	4.08272	12.1846	15.0805	318	3.72713	10.8786	13.9052	198	2.10261	6.19231	7.52859	115	1.64629	4.78584	6.10208	140	1.91035	5.53598	6.94359	175	2.47793	7.13969	9.15648	189	2.50365	7.46832	9.29122	191	2.57463
CYP1A1	15	complement(74719542..74725610)	ENSG00000140465	49.3068	1.33288	0.414552	0.0386232	0.543828	1	54.5543	1.82072	0.864506	0	0	0	7344	35.7252	108.887	129.06	5256	58.6387	175.003	222.025	4684	53.5564	156.319	204.818	2670	27.66	81.4604	101.522	4048	56.5323	164.342	214.793	2035	27.0893	78.5017	100.93	3564	49.2308	141.849	186.478	4514	58.334	174.009	221.908	4266	56.0983
PLA2G4B	15	41837775..41848147	ENSG00000243708	1.04238	1.03331	0.0472774	0.895217	0.99988	1	1.05656	3.65299	1.86908	4.36921e-06	0.00836145	0.0938289	167	0.934847	2.84932	2.93478	57	0.73179	2.18397	2.40781	111	1.4605	4.26285	4.85371	151	1.80012	5.30145	5.7415	25	0.401771	1.16797	1.32654	55	0.842515	2.44152	2.72784	108	1.71674	4.94646	5.65086	57	0.847651	2.52852	2.80211	40	0.605301
SNX22	15	64151715..64157481	ENSG00000157734	0.350572	3.11822	1.64072	0.000123777	0.0134248	1	0.246151	1.21665	0.282919	0.528015	0.999875	1	59	0.26929	0.820771	1.03684	44	0.460584	1.37458	1.85866	30	0.321842	0.939384	1.31181	8	0.0777604	0.229009	0.304186	10	0.131034	0.380921	0.530615	10	0.124899	0.361944	0.495971	22	0.285134	0.821558	1.1511	15	0.181877	0.542534	0.737398	22	0.271443
SULT1A3	16	30199228..30204310	ENSG00000261052	6.10942	2.46765	1.30314	1.72503e-08	8.05327e-06	0.00037045	10.748	-1.57545	-0.655764	1.57435e-05	0.0177943	0.338091	781	8.50735	25.9296	13.7249	141	3.52249	10.5126	5.95615	246	6.29842	18.3836	10.7569	125	2.8997	8.53978	4.7529	79	2.4705	7.18185	4.19186	69	2.05676	5.96026	3.4222	226	6.99051	20.1418	11.8249	186	5.38238	16.0555	9.14374	262	7.71492
CDH16	16	complement(66908122..66918984)	ENSG00000166589	35.0269	1.51751	0.601707	4.209e-09	2.31345e-06	9.03883e-05	28.5052	1.22947	0.298042	0.00387801	0.808805	1	8315	38.0036	115.831	146.124	3424	35.8908	107.113	144.637	2903	31.1862	91.0253	126.94	2162	21.0435	61.9743	82.2062	1993	26.1507	76.0214	105.752	1771	22.1499	64.188	87.8364	1982	25.7231	74.1162	103.704	2578	31.3014	93.3711	126.734	2306	28.4911
AC012184.2	16	70299194..70372582	ENSG00000260537	0.387255	-13.4117	-3.74542	2.01124e-07	7.19855e-05	0.00431913	0.22606	-1.17753	-0.235768	0.842853	0.999875	1	0	0	0	0	0	0	0	0	6	0.0910912	0.265874	0.262363	16	0.220086	0.648165	0.608371	26	0.482125	1.40156	1.3796	26	0.459554	1.33174	1.28952	0	0	0	0	0	0	0	0	32	0.558739
AC138811.2	16	complement(18788063..18801519)	ENSG00000260342	1.21001	-7.89728	-2.98136	3.66212e-05	0.00517394	0.78644	0.879306	-2.73456	-1.45131	0.0840992	0.999875	1	14	0.306199	0.933263	0.24603	0	0	0	0	2	0.102815	0.300095	0.0874542	6	0.279464	0.823038	0.228139	20	1.2558	3.65066	1.06123	35	2.09476	6.07038	1.7359	0	0	0	0	16	0.929637	2.77308	0.786558	0	0
AC138969.1	16	16317444..16350590	ENSG00000183889	4.70648	-3.04521	-1.60654	1.53623e-05	0.00249929	0.329906	3.64214	-2.10543	-1.07411	0.00686042	0.999875	1	276	2.15912	6.58078	4.8503	74	1.32766	3.96229	3.12592	61	1.12163	3.27378	2.66735	383	6.38066	18.7914	14.5629	51	1.14539	3.32969	2.70614	308	6.59339	19.1069	15.2759	45	0.999625	2.88023	2.35452	57	1.18457	3.53353	2.80211	135	2.85488
ZG16	16	29778240..29782973	ENSG00000174992	17.9678	-1.55566	-0.637527	1.42398e-09	8.99356e-07	3.05799e-05	18.7073	-1.07591	-0.105561	0.385208	0.999875	1	1754	9.35785	28.5218	30.824	936	11.4528	34.1798	39.5387	1093	13.7063	40.0055	47.7937	1442	16.3837	48.2509	54.8295	1159	17.7519	51.6055	61.4983	1354	19.7677	57.2846	67.1545	1064	16.1193	46.4446	55.6714	1154	16.3558	48.7888	56.7305	1301	18.7634
SOX9	17	72121020..72126420	ENSG00000125398	16.0498	1.56508	0.646235	7.82115e-10	5.24872e-07	1.67959e-05	12.6516	1.15753	0.211055	0.0476436	0.999875	1	4627	19.6482	59.8859	81.3128	1586	15.4459	46.0972	66.9961	1308	13.0552	38.1052	57.195	1149	10.3907	30.6011	43.6887	805	9.81373	28.529	42.7145	913	10.6093	30.7445	45.2821	969	11.6844	33.6662	50.7007	1127	12.7135	37.9241	55.4032	1181	13.5569
FCGBP	19	complement(39863323..39934626)	ENSG00000275395	0.635452	1.88569	0.915094	3.41428e-07	0.000107826	0.00733216	0.441014	1.66477	0.735324	0.000357373	0.191865	1	502	0.655999	1.99942	8.82192	244	0.731269	2.18241	10.3071	169	0.519086	1.51509	7.38988	112	0.311686	0.917934	4.2586	96	0.360152	1.04698	5.09391	97	0.346867	1.00518	4.81092	120	0.445285	1.283	6.27873	146	0.50684	1.51189	7.17734	105	0.370917
PNPLA6	19	7534004..7561764	ENSG00000032444	19.4074	1.51078	0.595298	0	0	0	15.2697	1.25011	0.322052	0.00194451	0.549287	1	6388	18.9023	57.6125	112.26	3117	21.1531	63.1299	131.669	2612	18.1667	53.0245	114.215	1964	12.3763	36.449	74.6776	1589	13.4986	39.2411	84.3148	1576	12.7614	36.9811	78.165	1733	14.5615	41.9562	90.6753	2117	16.6414	49.6408	104.071	1826	14.6062
AC008763.2	19	7629796..7643048	ENSG00000268400	0.230393	-24.6321	-4.62247	0.000487659	0.0380898	1	0.108322	1.83942	0.879254	0.492572	0.999875	1	0	0	0	0	1	0.0280547	0.083727	0.0422422	0	0	0	0	16	0.416809	1.22753	0.608371	4	0.140473	0.408361	0.212246	4	0.133896	0.388017	0.198388	0	0	0	0	10	0.324965	0.96936	0.491599	0	0
AC010323.1	19	complement(8308283..8321379)	ENSG00000167774	3.27884	-6.73267	-2.75118	2.35063e-06	0.000537019	0.0504798	0.954173	-1.42461	-0.510569	0.677201	0.999875	1	0	0	0	0	13	0.858957	2.56349	0.549149	9	0.609447	1.77884	0.393544	66	4.04934	11.9255	2.50953	49	4.05276	11.7816	2.60002	22	1.73442	5.02616	1.09114	0	0	0	0	26	1.9899	5.93583	1.27816	0	0
AD000671.2	19	complement(35739252..35745432)	ENSG00000267120	1.03759	-4.28866	-2.10053	2.00696e-06	0.00046595	0.0430995	0.745989	1.90756	0.931728	0.109741	0.999875	1	42	0.364575	1.11119	0.738089	0	0	0	0	17	0.346848	1.01237	0.74336	61	1.12763	3.32094	2.31942	32	0.797447	2.31822	1.69797	50	1.18768	3.44176	2.47985	17	0.419029	1.20735	0.889487	28	0.645675	1.92603	1.37648	50	1.17326
CCDC159	19	11344684..11354944	ENSG00000183401	2.90543	-1.65573	-0.727464	0.000131289	0.0140271	1	2.95878	-1.3494	-0.432316	0.0428988	0.999875	1	197	1.84209	5.6145	3.46199	77	1.65129	4.92813	3.25265	81	1.78025	5.19615	3.54189	162	3.22596	9.50063	6.15976	93	2.49656	7.2576	4.93472	117	2.99379	8.67566	5.80286	92	2.44281	7.03848	4.81369	86	2.13629	6.3725	4.22775	74	1.87052
SLCO4A1	20	62642445..62685785	ENSG00000101187	7.96172	1.85052	0.887932	6.55032e-15	1.40668e-11	1.40668e-10	5.47126	1.35165	0.434725	0.00128321	0.423163	1	1615	8.51567	25.9549	28.3813	655	7.92091	23.6393	27.6686	601	7.44858	21.7407	26.28	352	3.95265	11.6408	13.3842	275	4.16287	12.1017	14.5919	342	4.93473	14.3003	16.9622	393	5.88432	16.9545	20.5628	422	5.91122	17.633	20.7455	324	4.61826
GPCPD1	20	complement(5544404..5611026)	ENSG00000125772	1.44345	-1.5289	-0.612491	0.000197913	0.0194789	1	1.58765	-1.42851	-0.514507	0.00285586	0.689097	1	338	1.02039	3.11006	5.93986	146	1.01086	3.01683	6.16736	108	0.766351	2.2368	4.72253	247	1.58799	4.67672	9.39173	162	1.40404	4.08162	8.59597	162	1.33831	3.87828	8.03473	118	1.01156	2.91461	6.17408	132	1.05863	3.15785	6.4891	146	1.19149
ZBTB46	20	complement(63743666..63831244)	ENSG00000130584	3.47979	1.47685	0.562527	1.23308e-06	0.000319042	0.0264805	2.6531	1.02378	0.0339038	0.778604	0.999875	1	1282	4.00558	12.2086	22.5293	492	3.52557	10.5218	20.7832	396	2.90821	8.48839	17.3159	350	2.32887	6.85865	13.3081	262	2.35013	6.83195	13.9021	287	2.45386	7.11102	14.2344	283	2.51085	7.23453	14.8073	343	2.84701	8.49256	16.8618	308	2.60145
MRPS6	21	34073224..34143034	ENSG00000243927	119.269	1.72894	0.789884	1.60982e-14	3.14281e-11	3.4571e-10	92.3963	1.43421	0.520255	5.68131e-07	0.00203344	0.0122006	6186	104.41	318.232	108.71	3494	135.252	403.649	147.594	2978	118.144	344.835	130.219	1748	62.8311	185.041	66.4646	1583	76.7058	222.987	83.9964	1475	68.1265	197.423	73.1557	1719	82.3885	237.387	89.9428	2001	89.7219	267.638	98.3689	2303	105.079
SLC5A3	21	34073570..34106262	ENSG00000198743	12.8419	2.36518	1.24195	0	0	0	8.67897	1.57221	0.652792	1.30948e-06	0.00401729	0.028121	8316	12.004	36.5869	146.142	4947	16.3772	48.8764	208.972	2990	10.1446	29.6097	130.744	1631	5.01376	14.7658	62.0158	1567	6.49372	18.8775	83.1474	1218	4.81114	13.9422	60.4093	1556	6.37789	18.3767	81.4142	2658	10.1926	30.4041	130.667	2426	9.46647
SMIM11A	21	34375480..34407866	ENSG00000205670	0.755054	14.7538	3.88302	5.75652e-05	0.00752208	1	1.92628	1.45171	0.537749	0.504716	0.999875	1	262	2.16837	6.60898	4.60427	1	0.018981	0.0566474	0.0422422	4	0.0778118	0.227115	0.174908	3	0.0528753	0.155721	0.11407	1	0.02376	0.0690714	0.0530615	3	0.0679429	0.196891	0.148791	5	0.117506	0.338571	0.261614	171	3.75964	11.2149	8.40634	85	1.90168
MICALL1	22	37905657..37942822	ENSG00000100139	5.58788	1.45491	0.54093	1.15349e-06	0.000305816	0.0247711	4.62319	1.31387	0.393824	0.000642447	0.275931	1	1918	6.66719	20.3209	33.7061	671	5.34939	15.9648	28.3445	581	4.74705	13.8555	25.4054	577	4.2714	12.5795	21.9394	361	3.6026	10.4729	19.1552	388	3.69077	10.6954	19.2437	453	4.47146	12.8837	23.7022	513	4.73729	14.1312	25.219	496	4.66083
CLTRN	X	complement(15627318..15665031)	ENSG00000147003	2.27281	2.06475	1.04596	4.67504e-05	0.00631425	1	1.42203	1.4208	0.506707	0.0799816	0.999875	1	231	2.4461	7.45546	4.05949	96	2.33142	6.95793	4.05525	82	2.04093	5.95701	3.58562	65	1.4658	4.31686	2.47151	35	1.06401	3.09311	1.85715	25	0.724423	2.0993	1.23993	40	1.20276	3.46552	2.09291	57	1.60345	4.78304	2.80211	51	1.45989
[truncated: 14 more columns]
