# Supplementary material for: In Vitro Evaluation of the Effects of Prebiotics GOS and FOS on Human Colonic Caco–2 Cells
Source: Preprints.org preprint supplement (doi:10.20944/preprints202004.0108.v1), 2020-04-07
Supplement: Supplementary file 3 [file Supplementary Table S2_qPCR-raw_GOS-FOS.xlsx]

## Sheet: GOS-FOS_Ct-Conc
Ct: 2nde Derivative Ct value (Roche Lightcycler 480)
Conc: concentration computed with standard curve (Roche Lightcycler 480)
Group	Name	Ct_GPX2	Conc_GPX2	Ct_SLC5A3	Conc_SLC5A3	Ct_F13B	Conc_F13B	Ct_CYP1A1	Conc_CYP1A1	Ct_GALNT16	Conc_GALNT16	Ct_CAPN8	Conc_CAPN8	Ct_COL12A1	Conc_COL12A1	Ct_ACTB	Conc_ACTB	Ct_GAPDH	Conc_GAPDH	Ct_PUM1	Conc_PUM1
GOS	GOS_1	24.27	0.161	29.1767	0.286333	35.09	0.0209	25.215	0.07565	27.7267	0.154333	26.5667	0.320333	24.1633	0.326333	19.745	6.12	19.115	10.21	25.475	0.061
GOS	GOS_2	23.905	0.216	28.4333	0.513667	35.1633	0.0223333	24.125	0.181	27.6867	0.157667	26.42	0.356333	24.36	0.276333	19.295	8.77	18.49	16.9	24.97	0.0915
GOS	GOS_3	24.07	0.1885	29.1067	0.302	34.62	0.0330667	24.04	0.1935	27.74	0.153	26.61	0.312333	24.6033	0.223333	19.055	10.65	18.8	15.27	24.52	0.132
GOS	GOSmock_1	25.08	0.08395	30.1667	0.132167	32.7933	0.115633	24.82	0.103	26.8367	0.277667	27.6967	0.15	24.9433	0.167	18.925	11.85	18.23	20.75	24.35	0.1505
GOS	GOSmock_2	24.66	0.1175	29.7133	0.185667	32.7067	0.122667	23.785	0.2375	27.13	0.232	27.6967	0.150333	25.08	0.149333	18.945	11.65	17.88	27.45	24.285	0.1585
GOS	GOSmock_3	25.45	0.063	30.5667	0.0965	34.7633	0.0298	25.01	0.0887	27.0433	0.241	27.89	0.131333	25.4067	0.112333	19.115	10.145	18.27	20.1	24.685	0.1145
GOS	Std_0.25	23.92	0.213333	30.15	0.131667	32.8033	0.114633	23.8733	0.221667	28.06	0.124	27.9067	0.130333	25.3333	0.12	18.4033	18.1	17.4833	37.7	24.33	0.152667
GOS	Std_0.125	24.9433	0.0936333	31.2133	0.0584667	33.69	0.0609667	24.73	0.111333	28.99	0.0675667	29.2333	0.0535667	26.0967	0.0622333	19.4	8.07667	18.48	17	25.0733	0.0844
GOS	Std_0.0625	25.65	0.0530333	31.9033	0.0327	34.6033	0.0296667	25.82	0.0471333	29.9867	0.0356	29.8367	0.0353667	26.8167	0.0336333	20.3067	3.91333	19.4133	8.09	25.71	0.0508
GOS	Std_0.03125	26.5533	0.0256333	32.6433	0.0185333	36.5533	0.00792	26.62	0.0243	31.7133	0.0119767	30.89	0.0180233	27.68	0.0161	21.36	1.67667	22.9333	2.0371	26.8367	0.0204333
GOS	Std_0.015625	27.2733	0.0143667	33.91	0.00677667	37.25	0.00456333	27.6167	0.0109	32.55	0.00954	31.5667	0.00804333	28.5	0.00708	22.2333	0.83	21.32	1.73333	27.6633	0.01049
		Ct_GPX2	Conc_GPX2	Ct_SLC5A3	Conc_SLC5A3	Ct_RGPD5	Conc_RGPD5	Ct_CYP1A1	Conc_CYP1A1	Ct_SULT1A3	Conc_SULT1A3	Ct_ACTB	Conc_ACTB	Ct_GAPDH	Conc_GAPDH	Ct_PUM1	Conc_PUM1
FOS	FOS_1	24.27	0.161	30.0533	0.243667	21.7	17.8	23.74	0.2455	23.4933	0.237667	18.445	17.5	17.745	30.65	24.49	0.135
FOS	FOS_2	24.045	0.1925	29.48	0.367	21.69	18	23.61	0.273	23.6033	0.218	18.78	13.3	17.575	35.25	24.285	0.1585
FOS	FOS_3	27.075	0.02021	29.4	0.390333	21.67	18.2	27.225	0.01495	26.1933	0.03	21.905	1.075	20.71	2.815	28.155	0.00708
FOS	FOSmock_1	24.835	0.102	31.1533	0.1174	21.13	25.3	24.87	0.0997	23.5533	0.227	18.64	14.9	18.01	24.75	24.55	0.128
FOS	FOSmock_2	24.835	0.102	30.2267	0.214667	21.12	25.5	24.74	0.1105	23.73	0.197667	19.075	10.56	17.995	25.1	24.835	0.102
FOS	FOSmock_3	25.495	0.0599	30.3433	0.197667	21.17	24.8	25.055	0.08575	23.79	0.189333	19.075	10.5	18.25	20.4	25.065	0.08595
FOS	Std_0.25	23.92	0.213333	30.15	0.131667	29.74	0.131	23.8733	0.221667	24.4533	0.113333	18.4033	18.1	17.4833	37.7	24.33	0.152667
FOS	Std_0.125	24.9433	0.0936333	31.2133	0.0584667	31.22	0.053	24.73	0.111333	25.0633	0.0713667	19.4	8.07667	18.48	17	25.0733	0.0844
FOS	Std_0.0625	25.65	0.0530333	31.9033	0.0327	32.09	0.0317	25.82	0.0471333	26.14	0.0312667	20.3067	3.91333	19.4133	8.09	25.71	0.0508
FOS	Std_0.03125	26.5533	0.0256333	32.6433	0.0185333	33.3667	0.0151	26.62	0.0243	27.08	0.0152333	21.36	1.67667	22.9333	2.0371	26.8367	0.0204333
FOS	Std_0.015625	27.2733	0.0143667	33.91	0.00677667	33.8633	0.01093	27.6167	0.0109	27.9833	0.00790333	22.2333	0.83	21.32	1.73333	27.6633	0.01049
